# Supplementary material
Source: PubMed Central journal article supplement (PMC5571351)
Supplement: AAC.00863-17_zac009176455s1.pdf [file AAC.00863-17_zac009176455s1.pdf]

## **Supplementary Material**

**$\beta$ -Lactam Antibiotics with a High Affinity for PBP2 Act Synergistically  
with the FtsZ-Targeting Agent TXA707 against Methicillin-Resistant  
*Staphylococcus aureus***

**Edgar Ferrer-González, Malvika Kaul, Ajit K. Parhi, Edmond J. LaVoie, and Daniel S.  
Pilch#**

#Address correspondence to Daniel S. Pilch: [pilchds@rwjms.rutgers.edu](mailto:pilchds@rwjms.rutgers.edu)

**SUPPLEMENTAL FIGURES**

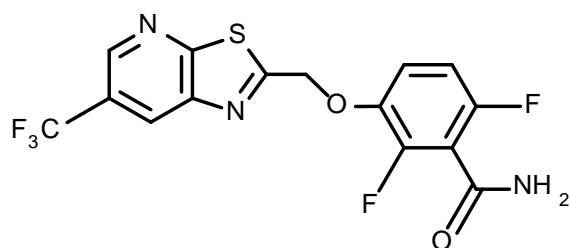

**FIG S1** Chemical structure of TXA707.

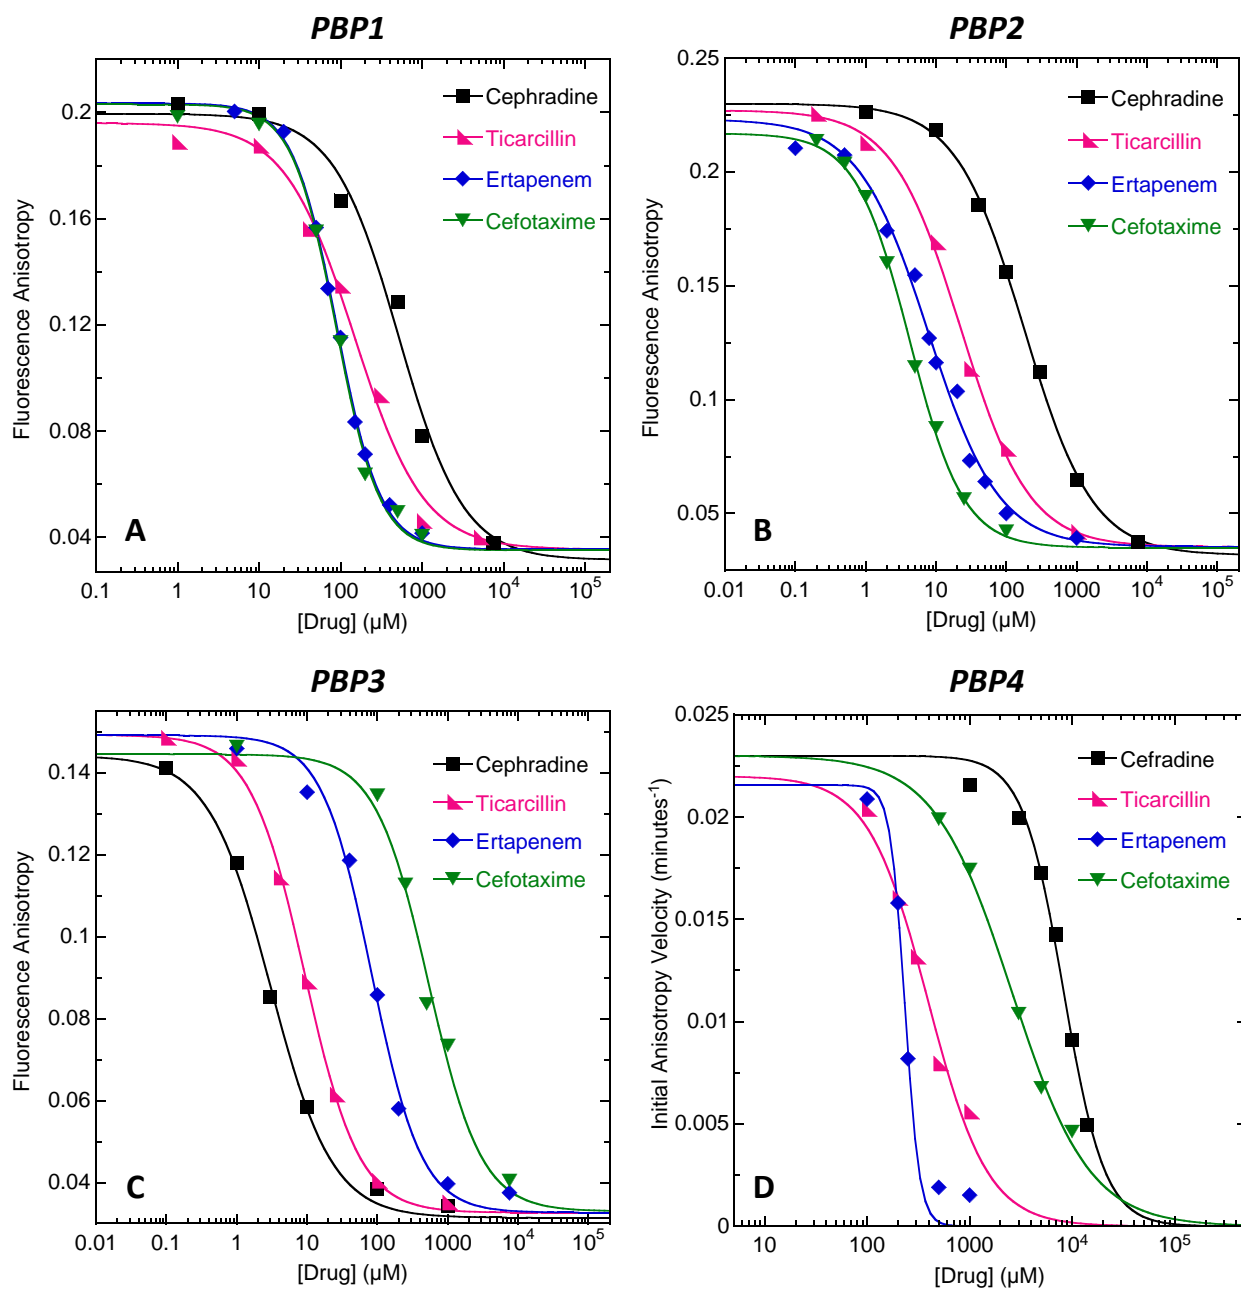

**FIG S2** (A-C) Fluorescence anisotropy of 1  $\mu\text{M}$  Bocillin in the presence of the indicated  $\beta$ -lactam antibiotic and 2  $\mu\text{M}$  of either PBP1 (A), PBP2 (B), or PBP3 (C). (D) Initial anisotropy velocity of 1  $\mu\text{M}$  Bocillin in the presence of the indicated  $\beta$ -lactam and 50  $\mu\text{M}$  PBP4. The solid lines reflect the nonlinear least squares fits of the data with Eq. 1. Experimental conditions were as described in the legends to Figs. 1 (for PBP1, PBP2, and PBP3) and 2 (for PBP4).

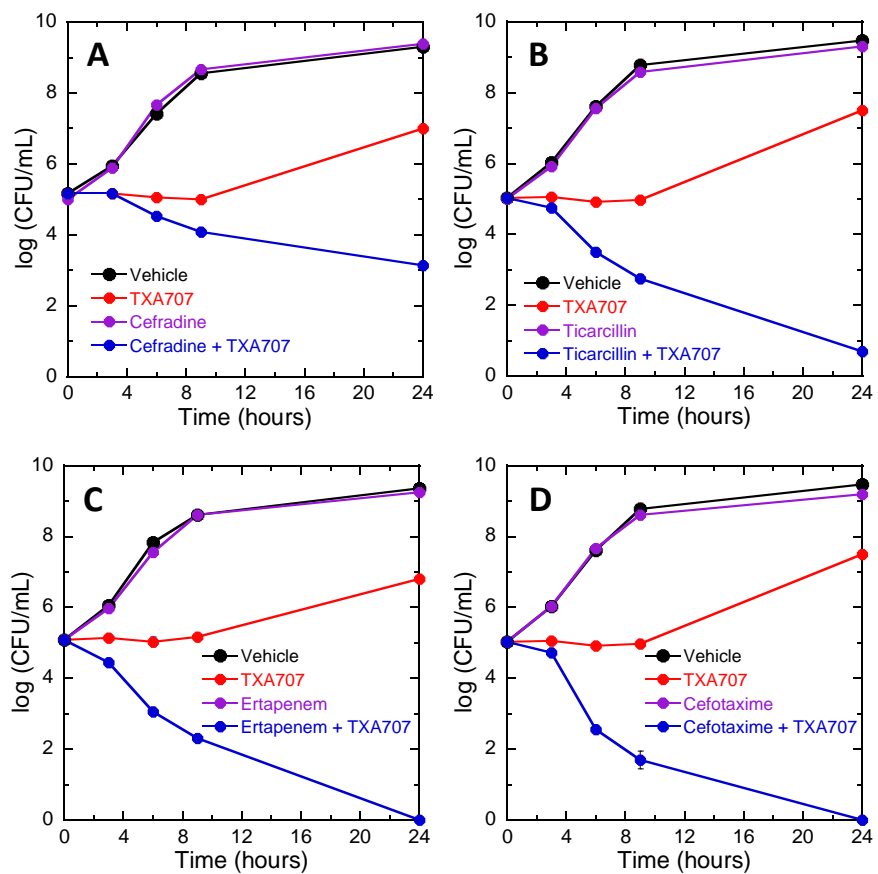

**FIG S3** Time-kill curves for MRSA COL showing synergy between TXA707 and cefradine (A), ticarcillin (B), ertapenem (C), or cefotaxime (D). Bacteria were treated with DMSO vehicle (black),  $\beta$ -lactam alone at 0.008x MIC (violet), TXA707 alone at 0.5x MIC (red), or a combination of  $\beta$ -lactam at 0.008x MIC and TXA707 at 0.5x MIC (blue).
